# Supplementary figures and images for: A reasonable correlation between cloacal and cecal microbiomes in broiler chickens
Source: PubMed Central journal article supplement — Poult Sci. 2020 Aug 26;99(11):6062–70. doi: 10.1016/j.psj.2020.08.015 (PMC7647853; doi:10.1016/j.psj.2020.08.015), 2020-08-26

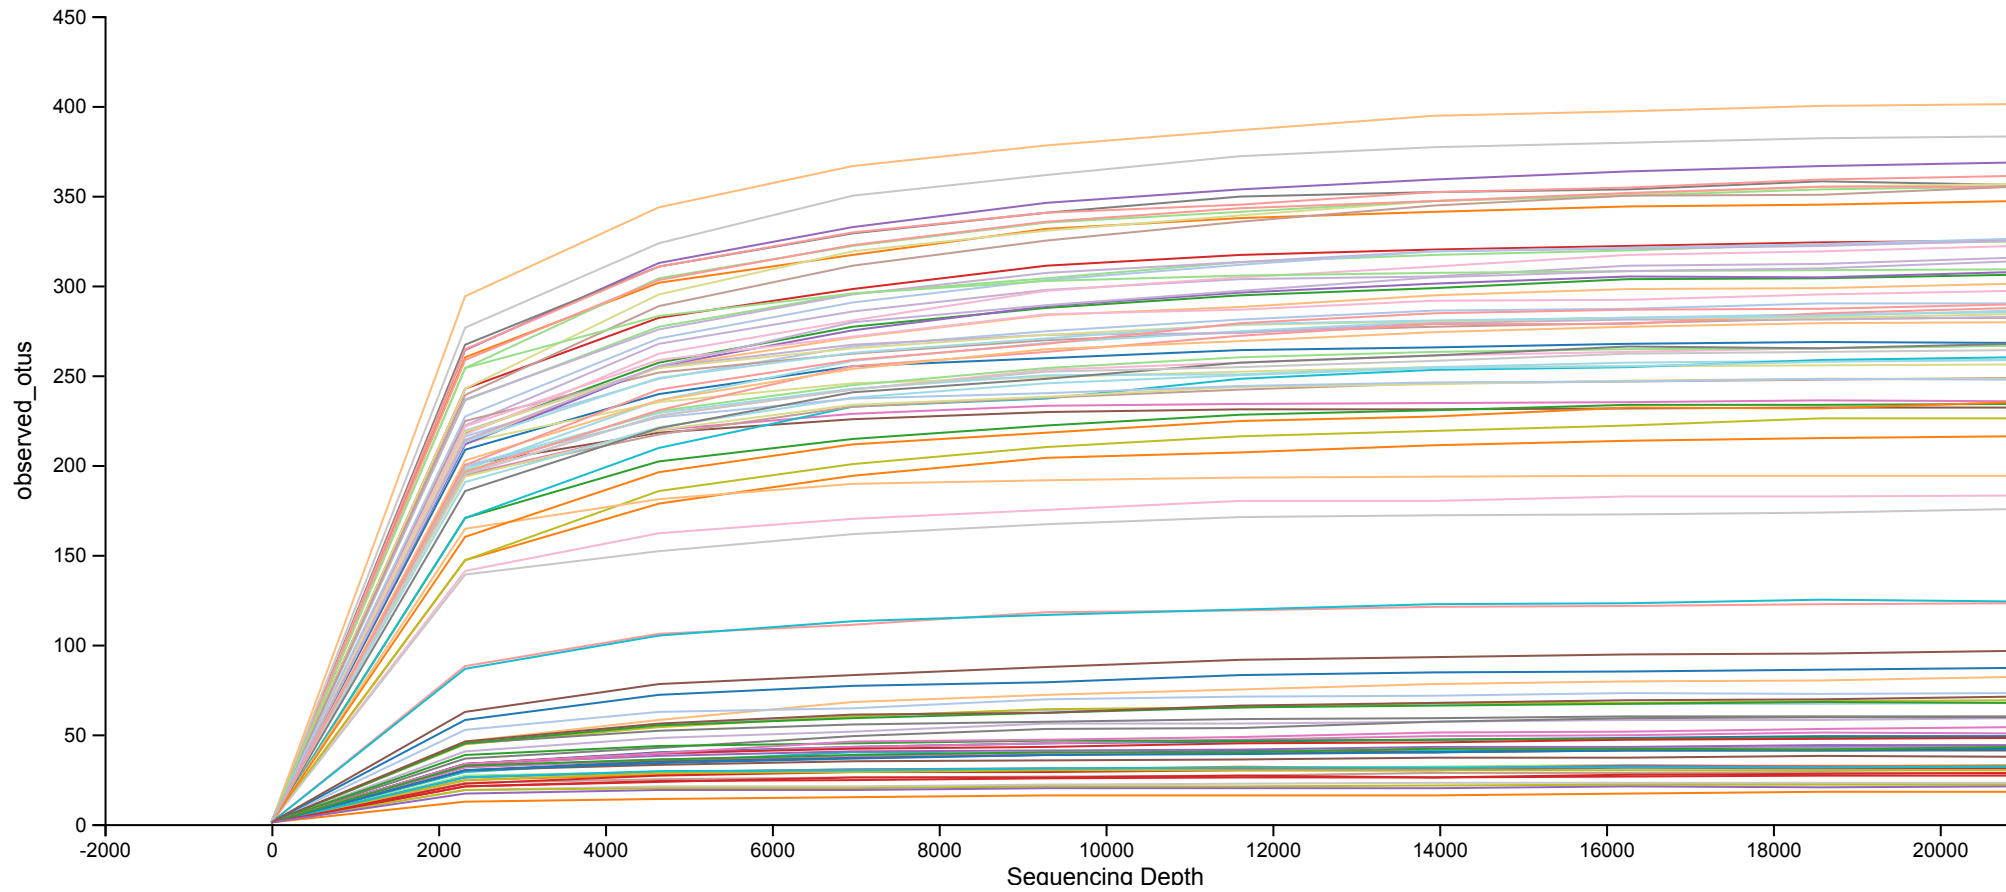

Supplement: mmc1.pdf [file mmc1.pdf]
